# Supplementary material for: Screening of potential novel candidate genes in schwannomatosis patients
Source: PubMed Central journal article supplement (PMC9540472; doi:10.1002/humu.24424), 2022-06-27
Supplement: HUMU-43-1368-s001.pdf [file HUMU-43-1368-s001.pdf]

## Supplementary materials

### Screening of potential novel candidate genes in schwannomatosis patients.

Cristina Perez-Becerril<sup>1,2</sup>, Andrew J. Wallace<sup>2</sup>, Helene Schlecht<sup>2</sup>, Naomi L. Bowers<sup>2</sup>, Philip T. Smith<sup>2</sup>, Carolyn Gokhale<sup>2</sup>, Helen Eaton<sup>2</sup>, Chris Charlton<sup>2</sup>, Rachel Robinson<sup>3</sup>, Ruth S Charlton<sup>3</sup>, D. Gareth Evans<sup>1,2</sup>, Miriam J. Smith<sup>1,2</sup>.

#### Supporting Table S1. Clinical genetic testing summary.

|                | No. of Index Cases         |                   |      |
|----------------|----------------------------|-------------------|------|
|                | Screening for Germline PVs |                   |      |
|                | NGS                        | Sanger sequencing | MLPA |
| <i>NF2</i>     | 43                         | 32                | 75   |
| <i>SMARCB1</i> | 47                         | 28                | 75   |
| <i>LZTR1</i>   | 53                         | 22                | 75   |

**Supporting Table S3.** Primer sequence for amplification of exonic regions of candidate genes and two intronic regions in *SMARCB1*.

| Gene         | Exon/Intron | Sequence (5'-3')       |
|--------------|-------------|------------------------|
| <i>DGCR8</i> | E2Fa        | CAATGTGGCCAGCTTGACTAAG |
| <i>DGCR8</i> | E2Ra        | CTGTGTACAGCACCTTCCTGTC |
| <i>DGCR8</i> | E2Fb        | CCTGACCTTAAGTTGCTTAAGG |
| <i>DGCR8</i> | E2Rb        | GCTGCAATCCCAAATCTCTC   |
| <i>DGCR8</i> | E3F         | GTTCTCAGGAATGCTGTTGAG  |
| <i>DGCR8</i> | E3R         | GTCCTGTCCTCAAACATGCC   |
| <i>DGCR8</i> | E4F         | GTACCCAACAATTTCTTGTC   |
| <i>DGCR8</i> | E5R         | CAACAGTGGAGGTGCACAG    |
| <i>DGCR8</i> | E6F         | GAAATAGTGTTCATGTGGCCTG |
| <i>DGCR8</i> | E7R         | CTGACCAAAGTTACACCTTGTC |
| <i>DGCR8</i> | E8F         | CTGACTGCGCCTTGCTGTC    |
| <i>DGCR8</i> | E8R         | CACTTGTCACCACTGCTCAG   |
| <i>DGCR8</i> | E9F         | CTGTCACTGAAGTGCTGTCTC  |
| <i>DGCR8</i> | E9R         | CAGCTCACACTAACAGGGCAG  |
| <i>DGCR8</i> | E10F        | CTAGGCGAGCTCACAAGAAC   |
| <i>DGCR8</i> | E11R        | GACAATGCCAGGGCAACAG    |
| <i>DGCR8</i> | E12F        | GAGTGCTGCCTATTCCTGTAG  |
| <i>DGCR8</i> | E12R        | GCACAGAGCCTCAGGAATAC   |
| <i>DGCR8</i> | E13F        | CTGTTTCGTGTCTGCCAGAC   |
| <i>DGCR8</i> | E13R        | GAAGGAGGATCCAAGCATTTTC |
| <i>DGCR8</i> | E14F        | CTAGCCTGGCATCACAAGC    |
| <i>DGCR8</i> | E14R        | CATGGCTGTCCCTGTACAC    |
| <i>COQ6</i>  | E1F         | GAGGCAAGGTTTCGTTTTCC   |
| <i>COQ6</i>  | E1R         | CACTTTTGACCCTAATGGACC  |
| <i>COQ6</i>  | E2F         | GGAGAAGTCTTACAGTTGTGGG |
| <i>COQ6</i>  | E2R         | GAGCTCCCTCCTTGTCAGATG  |
| <i>COQ6</i>  | E3F         | GTAACAGGATGGAGGGACAAGG |

**Supporting Table S2 (continued).**

|                |      |                         |
|----------------|------|-------------------------|
| <i>COQ6</i>    | E4R  | CAGAGGATTTCTTTATGGTGG   |
| <i>COQ6</i>    | E5F  | GAGTTATCTCTGTGGCTTCTGTC |
| <i>COQ6</i>    | E5R  | CGATGAGACCATCTCCACTTG   |
| <i>COQ6</i>    | E6F  | CACACAACAATCAGAGCTGGAG  |
| <i>COQ6</i>    | E7R  | GCAGATTCCTTGAAACCAG     |
| <i>COQ6</i>    | E8F  | CTGGTTTCAAGGGAATCTGC    |
| <i>COQ6</i>    | E8R  | GAGATTGCACAGTGAGCCAAG   |
| <i>COQ6</i>    | E9F  | CAGTGTAGGCAAGTTGGGTAG   |
| <i>COQ6</i>    | E10R | TGTCCACTCCCTCTTGCTACT   |
| <i>COQ6</i>    | E11F | CTATGGGGAAGTATCCAGAGGTC |
| <i>COQ6</i>    | E11R | CAGGATAATCACTTGAACCTGG  |
| <i>COQ6</i>    | E12  | CAAGGACACTTGGGAAGAATAC  |
| <i>COQ6</i>    | E12  | GGTCTGGCTAATATACGCTCCTC |
| <i>CDNK2A</i>  | E1F  | GTTCCGAGATCTTGGAGGTC    |
| <i>CDNK2A</i>  | E1R  | CTGTGTGAAGGGAGGTCCAG    |
| <i>CDNK2A</i>  | E2F  | CGACAGCTCCGCAGAAGTTC    |
| <i>CDNK2A</i>  | E2R  | CTGAGGCAAGACCGGAGACTG   |
| <i>CDKN2A</i>  | E3F  | GTACATGCACGTGAAGCCATTG  |
| <i>CDKN2A</i>  | E3R  | CTTCGGTGACTGATGATCTAAG  |
| <i>CDNK2B</i>  | E1F  | AGGACGACGGGAGGGTAATG    |
| <i>CDNK2B</i>  | E1R  | CTACATCGGCGATCTAGGTTC   |
| <i>CDNK2B</i>  | E2F  | ACACCAGACATCAGAGACCTG   |
| <i>CDNK2B</i>  | E2R  | CAGACAGGCTTGCAAGCTTAC   |
| <i>TCM1</i>    | E15F | CTCAGATTTAGTTTACATT     |
| <i>TCM1</i>    | E15R | GTAACTGTAAGGGCAGGATAG   |
| <i>SMARCB1</i> | I4F* | -                       |
| <i>SMARCB1</i> | I4R* | -                       |
| <i>SMARCB1</i> | I6F  | CACCATATTTGTCAGTCTGG    |
| <i>SMARCB1</i> | I6R  | GGACAAATACTGCATGATTCC   |

\*This region was interrogated using NGS data.
